# Supplementary material for: New molecular architectures containing low-valent cluster centres with di- and trimetalated 2-vinylpyrazine ligands: synthesis and molecular structures of Ru5(CO)15(μ5-C4H2N2CHCH)(μ-H)2 and Ru8(CO)24(μ7-C4H2N2CHC)(μ-H)3
Source: Royal Society of Chemistry journal article supplement (doi:10.1039/c9ra03841h), 2019-01-01
Supplement: c9ra03841h1.pdf [file c9ra03841h1.pdf]

## Supporting Information

**New molecular architectures containing low-valent cluster centres with di- and tri-metalated 2-vinylpyrazine ligands: Synthesis and solid-state structures of  $\text{Ru}_5(\text{CO})_{15}(\mu_5\text{-C}_4\text{H}_2\text{N}_2\text{CH=CH})(\mu\text{-H})_2$  and  $\text{Ru}_8(\text{CO})_{24}(\mu_7\text{-C}_4\text{H}_2\text{N}_2\text{CH=C})(\mu\text{-H})_3$**

**Md. Monir Hossain, Nahid Akter, Shishir Ghosh,\* Vladimir N. Nesterov, Michael G. Richmond, Graeme Hogarth,\* Shariff E. Kabir\***

**Figure S1.** Hydride region of the VT  $^1\text{H}$  NMR spectra of **1** recorded over the temperature range 233-313 K

**Figure S2.** Aromatic region of the VT  $^1\text{H}$  NMR spectra of **2** recorded over the temperature range 233-313 K.

**Figure S3.** Room temperature EXSY  $^1\text{H}$  NMR spectrum of **3**.

**Figure S4.** Hydride region of the VT  $^1\text{H}$  NMR spectra of **3** recorded over the temperature range 233-298 K.

**Figure S5.** Aromatic region of the VT  $^1\text{H}$  NMR spectra of **3** recorded over the temperature range 233-298 K.

**Table S1.** Crystal data and structure refinement details for **1-3**.

**DFT Atomic Coordinates and Energies**

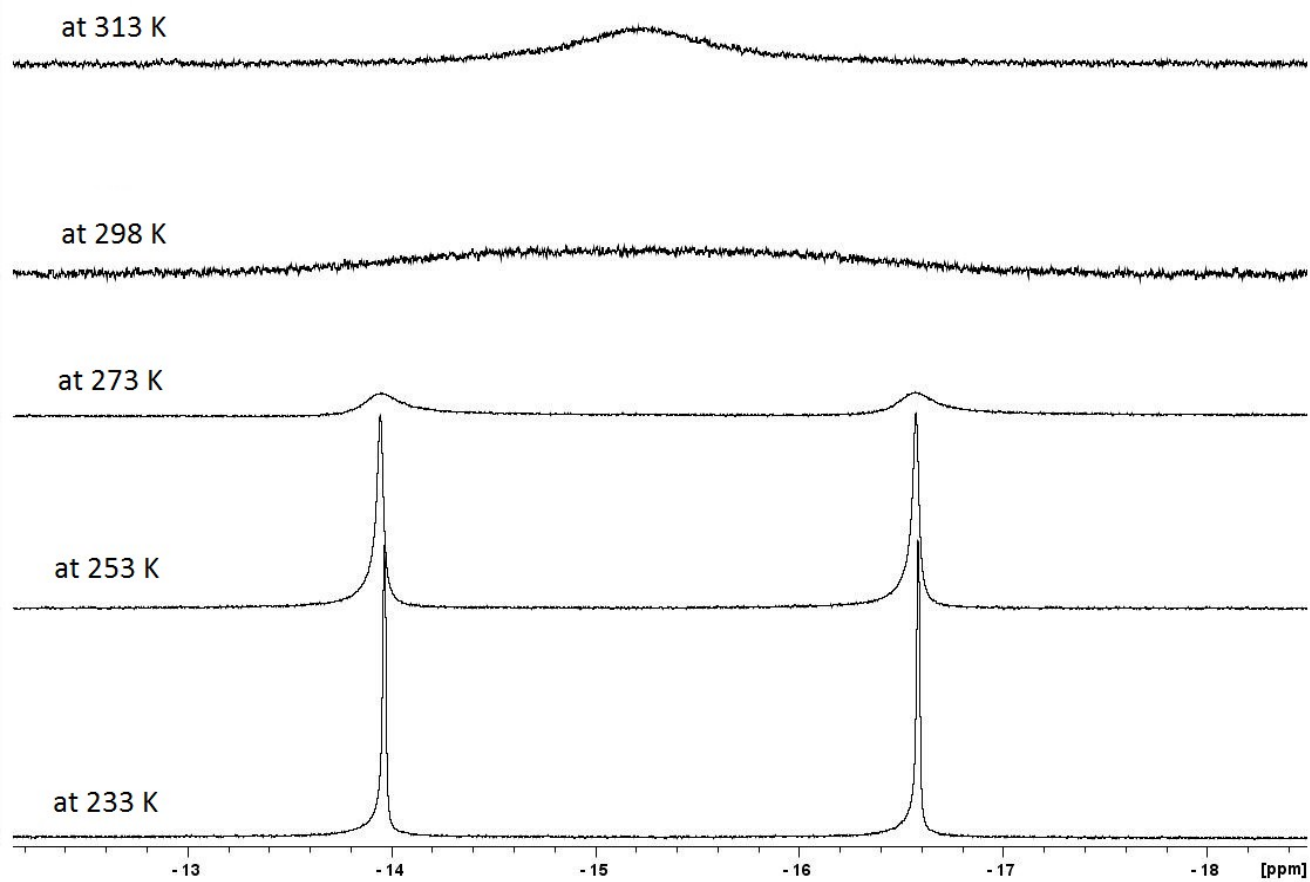

**Figure S1.** Hydride region of the VT <sup>1</sup>H NMR spectra of **2** recorded over the temperature range 233-313 K.

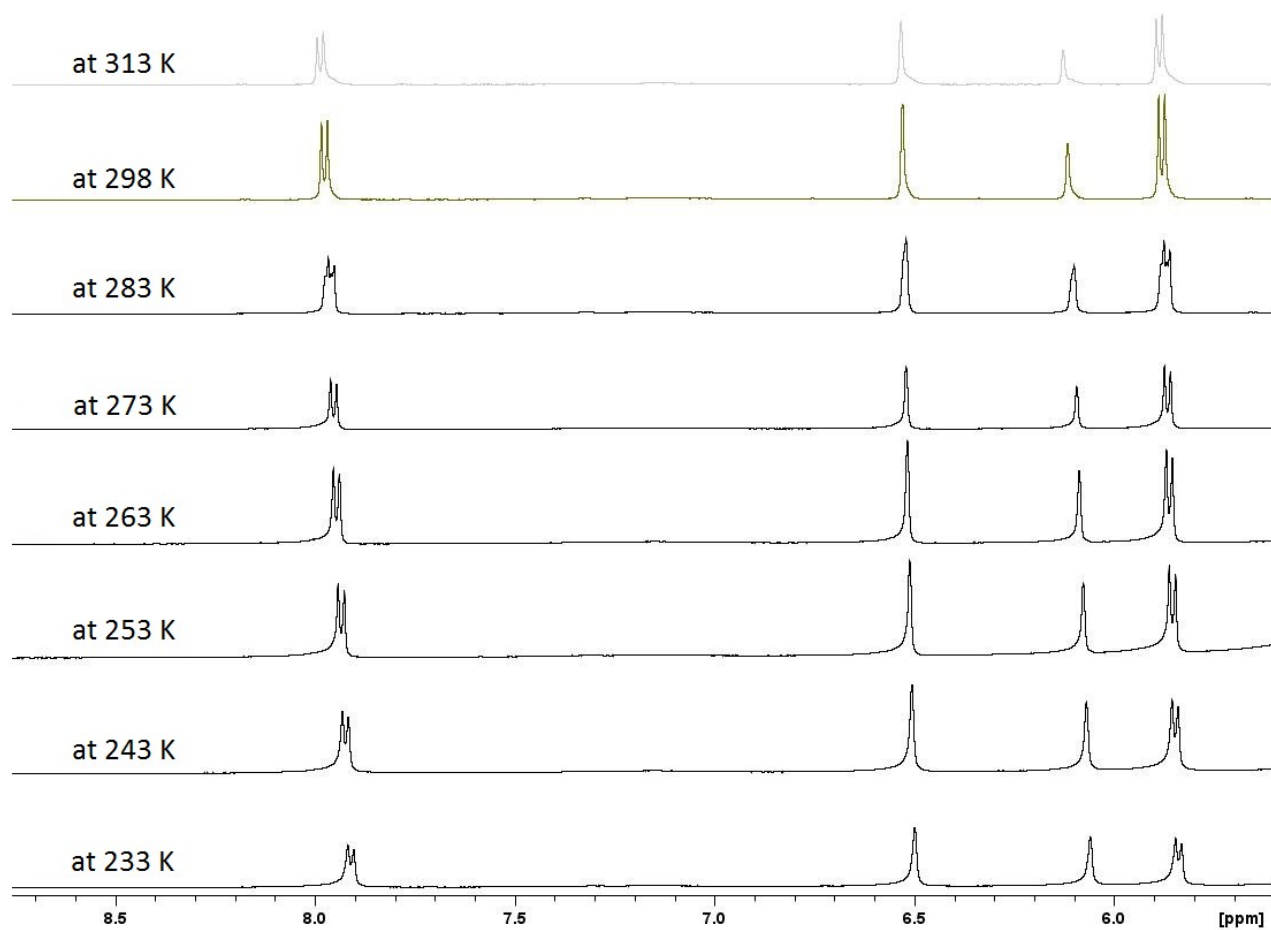

**Figure S2.** Aromatic region of the VT <sup>1</sup>H NMR spectra of **2** recorded over the temperature range 233-313 K.

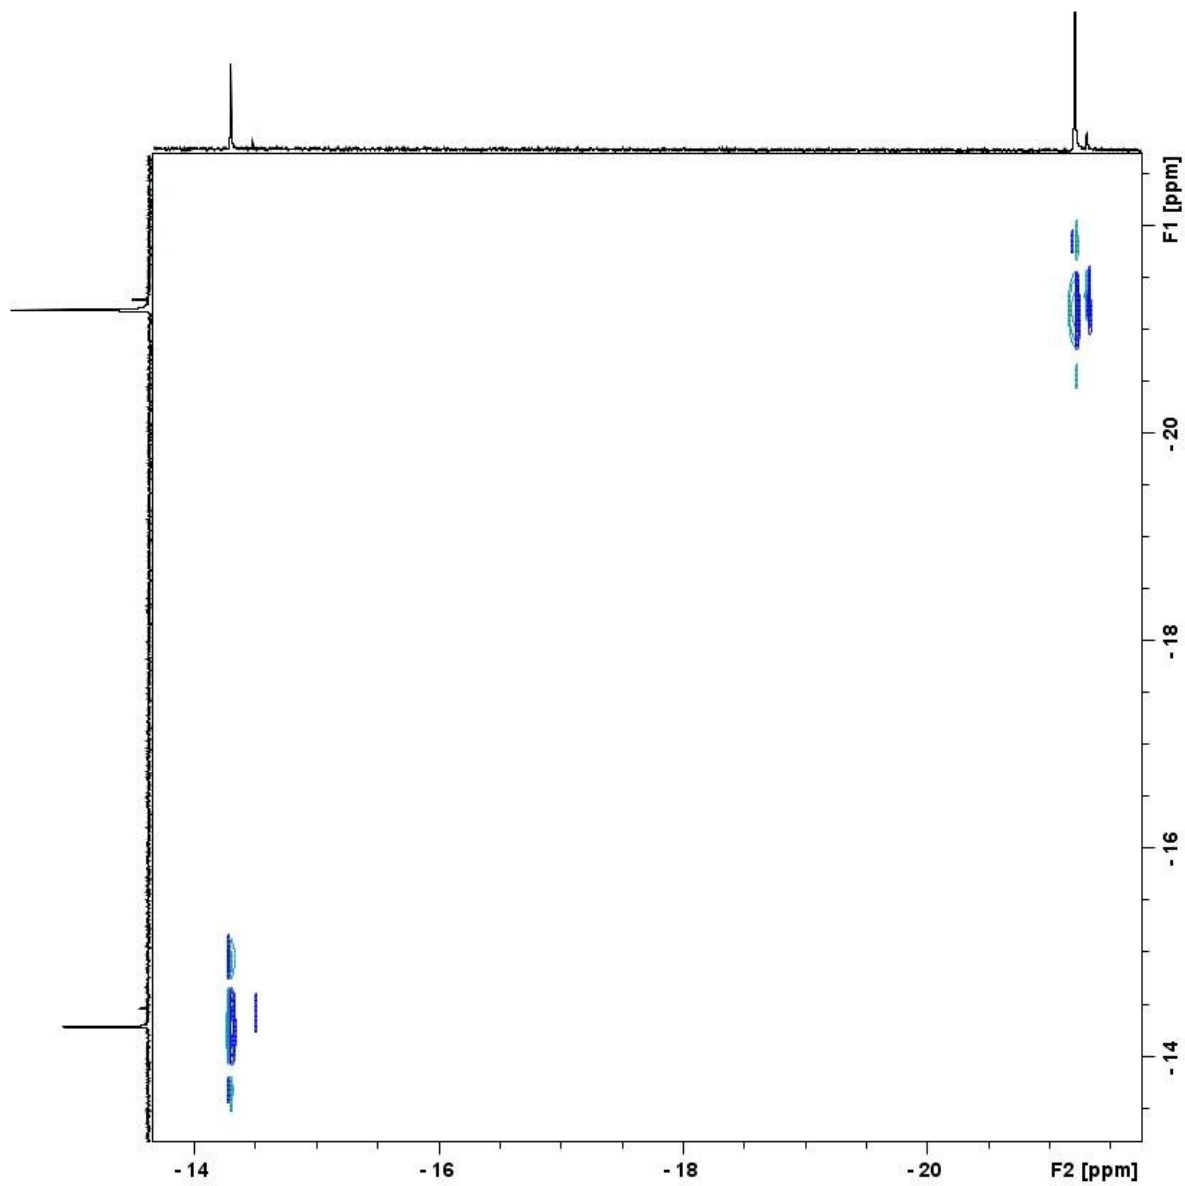

**Figure S3.** Room temperature EXSY  $^1\text{H}$  NMR spectrum of **3**.

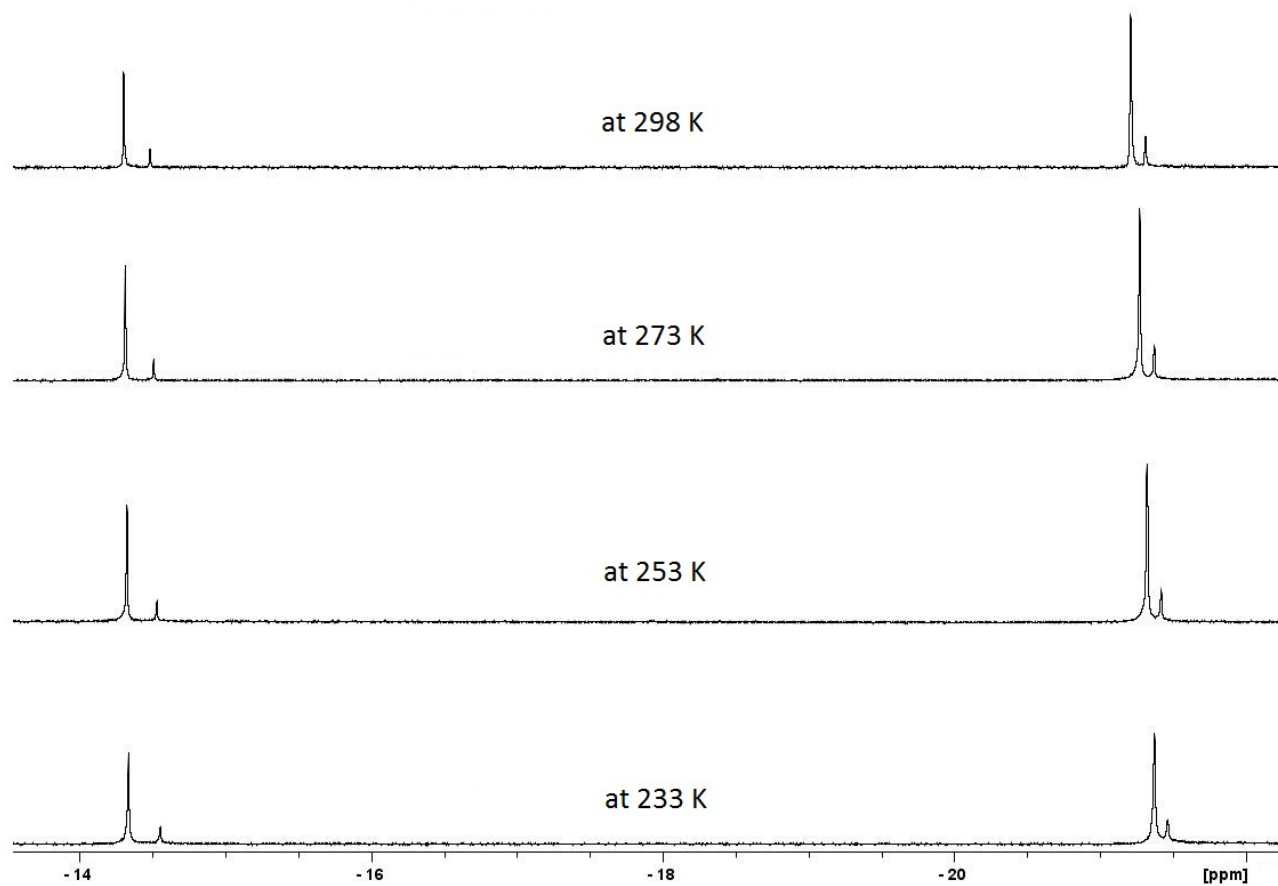

**Figure S4.** Hydride region of the VT  $^1\text{H}$  NMR spectra of **3** recorded over the temperature range 233-298 K.

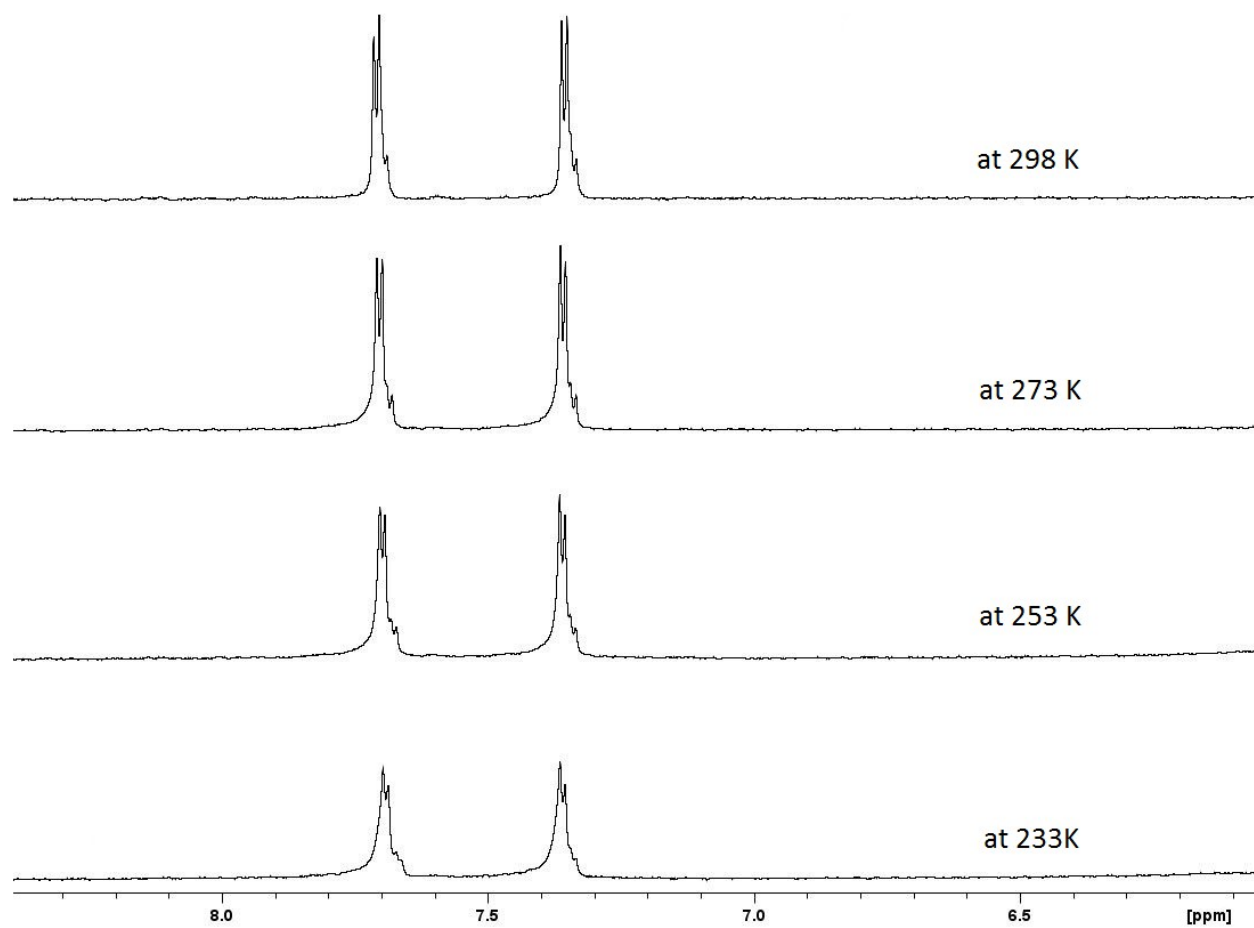

**Figure S5.** Aromatic region of the VT  $^1\text{H}$  NMR spectra of **3** recorded over the temperature range 233-298 K.

**Table S1.** Crystal data and structure refinement details for **1-3**

| Compound                                            | <b>1</b>                                                                                                                      | <b>2</b>                                                                      | <b>3</b>                                                                      |
|-----------------------------------------------------|-------------------------------------------------------------------------------------------------------------------------------|-------------------------------------------------------------------------------|-------------------------------------------------------------------------------|
| CCDC                                                | 1881604                                                                                                                       | 1877756                                                                       | 1877757                                                                       |
| Empirical formula                                   | C <sub>37</sub> H <sub>28</sub> N <sub>2</sub> O <sub>6</sub> P <sub>2</sub> Ru <sub>8</sub> ·CH <sub>2</sub> Cl <sub>2</sub> | C <sub>21</sub> H <sub>6</sub> N <sub>2</sub> O <sub>15</sub> Ru <sub>5</sub> | C <sub>30</sub> H <sub>6</sub> N <sub>2</sub> O <sub>24</sub> Ru <sub>8</sub> |
| Formula weight                                      | 1046.69                                                                                                                       | 1031.63                                                                       | 1586.39                                                                       |
| Temperature (K)                                     | 150.0(2)                                                                                                                      | 150.0(1)                                                                      | 150.0(1)                                                                      |
| Wavelength (Å)                                      | 0.71073                                                                                                                       | 0.71073                                                                       | 0.71073                                                                       |
| Crystal system                                      | monoclinic                                                                                                                    | triclinic                                                                     | monoclinic                                                                    |
| Space group                                         | <i>P2<sub>1</sub>/c</i>                                                                                                       | <i>P-1</i>                                                                    | <i>P2<sub>1</sub>/c</i>                                                       |
| Unit cell dimensions                                |                                                                                                                               |                                                                               |                                                                               |
| <i>a</i> (Å)                                        | 10.8780(7)                                                                                                                    | 9.2594(5)                                                                     | 10.3141(12)                                                                   |
| <i>b</i> (Å)                                        | 18.0767(11)                                                                                                                   | 14.0086(8)                                                                    | 31.916(4)                                                                     |
| <i>c</i> (Å)                                        | 19.8398(12)                                                                                                                   | 23.9807(14)                                                                   | 13.0093(14)                                                                   |
| $\alpha$ (°)                                        | 90                                                                                                                            | 75.588(2)                                                                     | 90                                                                            |
| $\beta$ (°)                                         | 96.527(2)                                                                                                                     | 79.665(2)                                                                     | 100.089(3)                                                                    |
| $\gamma$ (°)                                        | 90                                                                                                                            | 77.224(2)                                                                     | 90                                                                            |
| Volume (Å <sup>3</sup> )                            | 3876.0(4)                                                                                                                     | 2912.5(3)                                                                     | 4216.2(8)                                                                     |
| <i>Z</i>                                            | 4                                                                                                                             | 4                                                                             | 4                                                                             |
| Density (calculated) (Mg/m <sup>3</sup> )           | 1.794                                                                                                                         | 2.353                                                                         | 2.500                                                                         |
| Absorption coefficient (mm <sup>-1</sup> )          | 1.423                                                                                                                         | 2.606                                                                         | 2.873                                                                         |
| <i>F</i> (000)                                      | 2064                                                                                                                          | 1944                                                                          | 2976                                                                          |
| Crystal size (mm <sup>3</sup> )                     | 0.25 × 0.10 × 0.03                                                                                                            | 0.40 × 0.08 × 0.08                                                            | 0.19 × 0.11 × 0.06                                                            |
| $\theta$ range for data collection (°)              | 2.196 to 28.333                                                                                                               | 2.275 to 28.361                                                               | 2.489 to 27.102                                                               |
| Index ranges                                        | -14 ≤ <i>h</i> ≤ 14,<br>-24 ≤ <i>k</i> ≤ 24,<br>-26 ≤ <i>l</i> ≤ 26                                                           | -12 ≤ <i>h</i> ≤ 12,<br>-18 ≤ <i>k</i> ≤ 18,<br>-31 ≤ <i>l</i> ≤ 31           | -13 ≤ <i>h</i> ≤ 12,<br>-40 ≤ <i>k</i> ≤ 40,<br>-16 ≤ <i>l</i> ≤ 16           |
| Reflections collected                               | 62857                                                                                                                         | 151823                                                                        | 61898                                                                         |
| Independent reflections [ <i>R</i> <sub>int</sub> ] | 9637 [ <i>R</i> <sub>int</sub> = 0.1196]                                                                                      | 14508 [ <i>R</i> <sub>int</sub> = 0.0259]                                     | 9295 [ <i>R</i> <sub>int</sub> = 0.0397]                                      |
| Data / restraints / parameters                      | 9295 / 1 / 490                                                                                                                | 14508 / 0 / 792                                                               | 9295 / 4 / 590                                                                |
| Goodness of fit on <i>F</i> <sup>2</sup>            | 1.027                                                                                                                         | 1.112                                                                         | 1.178                                                                         |
| Final <i>R</i> indices [ <i>I</i> > 2σ( <i>I</i> )] | <i>R</i> <sub>1</sub> = 0.0570, <i>wR</i> <sub>2</sub> = 0.0894                                                               | <i>R</i> <sub>1</sub> = 0.0140, <i>wR</i> <sub>2</sub> = 0.0298               | <i>R</i> <sub>1</sub> = 0.0410, <i>wR</i> <sub>2</sub> = 0.0756               |
| <i>R</i> indices (all data)                         | <i>R</i> <sub>1</sub> = 0.1155, <i>wR</i> <sub>2</sub> = 0.1050                                                               | <i>R</i> <sub>1</sub> = 0.0163, <i>wR</i> <sub>2</sub> = 0.0304               | <i>R</i> <sub>1</sub> = 0.0528, <i>wR</i> <sub>2</sub> = 0.0786               |
| Largest diff. peak and hole (e. Å <sup>-3</sup> )   | 1.117 and -1.141                                                                                                              | 0.63 and -0.37                                                                | 1.813 and -1.010                                                              |

## DFT Coordinates and Energies

### Species A

HF energy= -2515.53408551

No Imaginary frequency

Zero-point correction= 0.234336 (Hartree/Particle)

Thermal correction to Energy= 0.283231

Thermal correction to Enthalpy= 0.284175

Thermal correction to Gibbs Free Energy= 0.145614

Sum of electronic and zero-point Energies= -2515.299749

Sum of electronic and thermal Energies= -2515.250855

Sum of electronic and thermal Enthalpies= -2515.249911

Sum of electronic and thermal Free Energies= -2515.388471

### Coordinates: A

|    |             |             |             |
|----|-------------|-------------|-------------|
| Ru | 2.79250000  | 1.59630000  | -0.40080000 |
| Ru | -3.49960000 | -1.34450000 | -0.56250000 |
| Ru | 2.73530000  | -1.35900000 | -1.02340000 |
| Ru | 2.00710000  | -0.29830000 | 1.52460000  |
| Ru | -3.28400000 | 1.33960000  | 0.19860000  |
| O  | 3.21850000  | 3.37810000  | -2.90860000 |
| O  | -6.49570000 | -1.49430000 | -0.06590000 |
| O  | 1.93720000  | 3.87120000  | 1.45770000  |
| N  | 0.81960000  | 0.92430000  | -0.79470000 |
| N  | -1.46960000 | -0.66970000 | -0.81230000 |
| O  | 0.82470000  | -2.80380000 | 2.86250000  |
| O  | -2.65130000 | -3.04180000 | 1.91520000  |
| O  | 5.65500000  | 1.62820000  | 0.66290000  |
| O  | 0.07580000  | 1.72580000  | 2.75570000  |
| O  | -3.48090000 | -3.45820000 | -2.79050000 |
| O  | 1.76830000  | -4.19360000 | -0.39110000 |
| O  | -2.49800000 | 0.14520000  | 2.93250000  |
| O  | 1.61730000  | -1.28060000 | -3.87670000 |
| O  | -2.39680000 | 4.26240000  | 0.58750000  |
| O  | 5.69310000  | -2.16800000 | -1.59770000 |
| O  | -6.24980000 | 1.79340000  | 0.85390000  |
| O  | 4.32490000  | 0.27780000  | 3.50590000  |
| C  | -2.99790000 | -2.44370000 | 1.00210000  |
| C  | 3.05510000  | 2.69550000  | -2.00440000 |
| C  | 2.24640000  | 2.99710000  | 0.78330000  |
| C  | -3.82120000 | 0.33490000  | -1.73470000 |
| H  | -4.72650000 | 0.60250000  | -2.28750000 |
| C  | 0.90820000  | -0.42910000 | -0.32220000 |
| C  | 4.58120000  | 1.65380000  | 0.26270000  |
| C  | 4.60670000  | -1.89320000 | -1.38030000 |



|   |             |             |             |
|---|-------------|-------------|-------------|
| C | -3.47730000 | -2.69490000 | -1.93440000 |
| C | -5.36220000 | -1.47450000 | -0.24200000 |
| C | 2.06280000  | -1.34080000 | -2.82470000 |
| C | -0.33930000 | -1.16700000 | -0.42710000 |
| H | -0.34580000 | -2.22100000 | -0.12700000 |
| C | 0.79360000  | 0.94700000  | 2.31210000  |
| C | -1.55240000 | 0.73260000  | -1.10190000 |
| C | 2.12870000  | -3.13690000 | -0.64380000 |
| C | 3.45790000  | 0.05110000  | 2.79240000  |
| C | -0.30270000 | 1.46180000  | -1.12580000 |
| H | -0.30820000 | 2.51850000  | -1.41770000 |
| C | -2.75190000 | 3.17920000  | 0.44090000  |
| C | -5.13360000 | 1.64690000  | 0.63170000  |
| C | -2.79330000 | 0.59570000  | 1.91690000  |
| C | -2.68400000 | 1.13900000  | -1.90920000 |
| H | -2.62870000 | 2.02250000  | -2.54960000 |
| C | 1.27320000  | -1.86790000 | 2.37420000  |
| H | 3.32780000  | -1.24790000 | 0.68160000  |
| H | 3.36770000  | 0.26230000  | -1.47780000 |

### Species TSAB

HF energy= -2515.51325229

One Imaginary frequency: 158i

Zero-point correction= 0.233499 (Hartree/Particle)

Thermal correction to Energy= 0.281764

Thermal correction to Enthalpy= 0.282708

Thermal correction to Gibbs Free Energy= 0.147314

Sum of electronic and zero-point Energies= -2515.279753

Sum of electronic and thermal Energies= -2515.231489

Sum of electronic and thermal Enthalpies= -2515.230544

Sum of electronic and thermal Free Energies= -2515.365938

### Coordinates: TSAB

|    |             |             |             |
|----|-------------|-------------|-------------|
| Ru | 2.77750000  | 1.66420000  | -0.61970000 |
| Ru | -3.53020000 | -1.31790000 | -0.61500000 |
| Ru | 2.78180000  | -1.33220000 | -0.90950000 |
| Ru | 1.91420000  | -0.35540000 | 1.52090000  |
| Ru | -3.23360000 | 1.34160000  | 0.22900000  |
| O  | 2.52860000  | 3.13190000  | -3.31540000 |
| O  | -6.52180000 | -1.45230000 | -0.09800000 |
| O  | 1.85080000  | 4.01210000  | 1.17810000  |
| N  | 0.81820000  | 0.88890000  | -0.84240000 |
| N  | -1.48910000 | -0.67830000 | -0.89140000 |
| O  | 0.33560000  | -2.68520000 | 2.68140000  |
| O  | -2.78570000 | -3.14860000 | 1.80600000  |
| O  | 5.77720000  | 2.22090000  | -0.31550000 |
| O  | 0.27010000  | 1.81980000  | 2.95080000  |

|   |             |             |             |
|---|-------------|-------------|-------------|
| O | -3.59300000 | -3.36070000 | -2.90440000 |
| O | 2.08740000  | -4.05220000 | 0.25560000  |
| O | -2.34140000 | -0.00870000 | 2.85440000  |
| O | 2.06420000  | -2.08360000 | -3.80190000 |
| O | -2.25160000 | 4.22110000  | 0.68350000  |
| O | 5.84340000  | -1.85870000 | -0.88970000 |
| O | -6.15530000 | 1.86910000  | 1.02570000  |
| O | 4.24960000  | -0.73200000 | 3.53530000  |
| C | -3.06310000 | -2.49340000 | 0.90960000  |
| C | 2.62930000  | 2.60020000  | -2.31040000 |
| C | 2.19240000  | 3.14150000  | 0.52670000  |
| C | -3.84570000 | 0.40430000  | -1.72200000 |
| H | -4.75840000 | 0.70530000  | -2.24460000 |
| C | 0.89000000  | -0.47200000 | -0.39160000 |
| C | 4.65580000  | 2.04160000  | -0.42330000 |
| C | 4.70710000  | -1.70610000 | -0.89620000 |
| C | -3.55830000 | -2.62390000 | -2.02650000 |
| C | -5.38900000 | -1.43040000 | -0.27930000 |
| C | 2.36940000  | -1.76100000 | -2.74300000 |
| C | -0.36160000 | -1.19300000 | -0.51900000 |
| H | -0.36980000 | -2.25860000 | -0.26380000 |
| C | 0.87250000  | 0.99360000  | 2.42800000  |
| C | -1.55720000 | 0.73510000  | -1.13230000 |
| C | 2.35430000  | -3.00600000 | -0.14310000 |
| C | 3.38190000  | -0.58420000 | 2.80230000  |
| C | -0.29920000 | 1.44600000  | -1.16230000 |
| H | -0.29910000 | 2.50460000  | -1.44800000 |
| C | -2.64800000 | 3.15410000  | 0.51540000  |
| C | -5.05720000 | 1.68810000  | 0.74550000  |
| C | -2.68640000 | 0.49800000  | 1.88060000  |
| C | -2.69660000 | 1.18930000  | -1.90200000 |
| H | -2.63910000 | 2.09050000  | -2.51720000 |
| C | 0.93410000  | -1.81050000 | 2.24110000  |
| H | 3.23540000  | 0.59500000  | 0.72970000  |
| H | 3.24470000  | 0.31250000  | -1.66640000 |

### Species B

HF energy= -2515.51463586

No Imaginary frequency

Zero-point correction= 0.234363 (Hartree/Particle)

Thermal correction to Energy= 0.283223

Thermal correction to Enthalpy= 0.284167

Thermal correction to Gibbs Free Energy= 0.147197

Sum of electronic and zero-point Energies= -2515.280272

Sum of electronic and thermal Energies= -2515.231413

Sum of electronic and thermal Enthalpies= -2515.230468

Sum of electronic and thermal Free Energies= -2515.367438

**Coordinates: B**

|    |             |             |             |
|----|-------------|-------------|-------------|
| Ru | 2.73050000  | 1.70960000  | -0.58630000 |
| Ru | -3.54930000 | -1.29900000 | -0.60050000 |
| Ru | 2.77910000  | -1.32090000 | -0.85800000 |
| Ru | 1.87070000  | -0.36190000 | 1.52760000  |
| Ru | -3.21370000 | 1.35220000  | 0.24670000  |
| O  | 2.72020000  | 2.84370000  | -3.45400000 |
| O  | -6.52660000 | -1.36230000 | 0.00420000  |
| O  | 1.58350000  | 4.21400000  | 0.81840000  |
| N  | 0.79770000  | 0.89660000  | -0.85700000 |
| N  | -1.50590000 | -0.67480000 | -0.91400000 |
| O  | 0.42630000  | -2.78460000 | 2.66330000  |
| O  | -2.76770000 | -3.14200000 | 1.79660000  |
| O  | 5.69150000  | 2.30170000  | -0.02570000 |
| O  | 0.27960000  | 1.73230000  | 3.13480000  |
| O  | -3.69500000 | -3.32830000 | -2.89980000 |
| O  | 1.96670000  | -4.11390000 | 0.01860000  |
| O  | -2.23520000 | -0.00110000 | 2.84010000  |
| O  | 2.38110000  | -1.89630000 | -3.86180000 |
| O  | -2.18520000 | 4.21770000  | 0.68980000  |
| O  | 5.80140000  | -1.82610000 | -0.34990000 |
| O  | -6.12150000 | 1.85970000  | 1.10930000  |
| O  | 4.43960000  | -0.89110000 | 3.18750000  |
| C  | -3.05910000 | -2.48350000 | 0.90700000  |
| C  | 2.73230000  | 2.43480000  | -2.38960000 |
| C  | 2.02010000  | 3.30160000  | 0.29450000  |
| C  | -3.87590000 | 0.42900000  | -1.69700000 |
| H  | -4.79760000 | 0.74120000  | -2.19690000 |
| C  | 0.87220000  | -0.46090000 | -0.39920000 |
| C  | 4.58830000  | 2.11160000  | -0.24030000 |
| C  | 4.68380000  | -1.68140000 | -0.56340000 |
| C  | -3.62780000 | -2.59860000 | -2.01780000 |
| C  | -5.40010000 | -1.37680000 | -0.21340000 |
| C  | 2.55720000  | -1.65770000 | -2.75260000 |
| C  | -0.37680000 | -1.18510000 | -0.53740000 |
| H  | -0.38510000 | -2.24990000 | -0.27930000 |
| C  | 0.82940000  | 0.90200000  | 2.56250000  |
| C  | -1.57480000 | 0.73850000  | -1.15230000 |
| C  | 2.27300000  | -3.04860000 | -0.28910000 |
| C  | 3.47400000  | -0.67940000 | 2.60680000  |
| C  | -0.31880000 | 1.45010000  | -1.18660000 |
| H  | -0.32200000 | 2.50710000  | -1.47870000 |
| C  | -2.60610000 | 3.15930000  | 0.52550000  |
| C  | -5.02710000 | 1.69160000  | 0.80760000  |
| C  | -2.61730000 | 0.50490000  | 1.87990000  |
| C  | -2.72430000 | 1.20380000  | -1.89840000 |

|   |             |             |             |
|---|-------------|-------------|-------------|
| H | -2.67200000 | 2.10860000  | -2.50900000 |
| C | 0.97440000  | -1.87930000 | 2.21780000  |
| H | 2.85900000  | 1.09510000  | 1.06200000  |
| H | 3.37850000  | 0.30750000  | -1.44700000 |

### Species TSBC

HF energy= -2515.51034300

One Imaginary frequency: 147i

Zero-point correction= 0.232946 (Hartree/Particle)

Thermal correction to Energy= 0.281814

Thermal correction to Enthalpy= 0.282759

Thermal correction to Gibbs Free Energy= 0.143084

Sum of electronic and zero-point Energies= -2515.277397

Sum of electronic and thermal Energies= -2515.228529

Sum of electronic and thermal Enthalpies= -2515.227584

Sum of electronic and thermal Free Energies= -2515.367259

### Coordinates: TSBC

|    |             |             |             |
|----|-------------|-------------|-------------|
| Ru | 2.74550000  | 1.69900000  | -0.26840000 |
| Ru | -3.54170000 | -1.26520000 | -0.37360000 |
| Ru | 2.68360000  | -1.27560000 | -0.94920000 |
| Ru | 2.13160000  | -0.55140000 | 1.65490000  |
| Ru | -3.37360000 | 1.50050000  | -0.02100000 |
| O  | 3.05640000  | 2.31540000  | -3.28660000 |
| O  | -6.56720000 | -1.34550000 | -0.06780000 |
| O  | 1.53820000  | 4.38970000  | 0.62970000  |
| N  | 0.79860000  | 0.90620000  | -0.54000000 |
| N  | -1.49490000 | -0.66760000 | -0.59530000 |
| O  | 1.45660000  | -3.45690000 | 2.22830000  |
| O  | -2.79230000 | -2.40510000 | 2.42850000  |
| O  | 5.60770000  | 2.47390000  | 0.51400000  |
| O  | 0.30240000  | 0.52360000  | 3.88700000  |
| O  | -3.39090000 | -3.74170000 | -2.18590000 |
| O  | 1.62030000  | -4.12780000 | -0.93510000 |
| O  | -2.74930000 | 0.85100000  | 2.92820000  |
| O  | 1.81870000  | -0.68810000 | -3.84240000 |
| O  | -2.64020000 | 4.48830000  | -0.12700000 |
| O  | 5.62280000  | -2.25050000 | -1.25470000 |
| O  | -6.39150000 | 1.93230000  | 0.36450000  |
| O  | 4.81280000  | -0.63920000 | 3.21380000  |
| C  | -3.12680000 | -2.03350000 | 1.39760000  |
| C  | 2.95160000  | 2.09460000  | -2.17280000 |
| C  | 1.99520000  | 3.40230000  | 0.28680000  |
| C  | -3.73880000 | 0.20990000  | -1.82060000 |
| H  | -4.58490000 | 0.39080000  | -2.49000000 |
| C  | 0.88070000  | -0.45660000 | -0.09270000 |
| C  | 4.54510000  | 2.19900000  | 0.20310000  |

|   |             |             |             |
|---|-------------|-------------|-------------|
| C | 4.53830000  | -1.89850000 | -1.14440000 |
| C | -3.43900000 | -2.83790000 | -1.48170000 |
| C | -5.42390000 | -1.34570000 | -0.16680000 |
| C | 2.19500000  | -0.92220000 | -2.78230000 |
| C | -0.38160000 | -1.16440000 | -0.16570000 |
| H | -0.41660000 | -2.19870000 | 0.19400000  |
| C | 0.97390000  | 0.16350000  | 3.03020000  |
| C | -1.54130000 | 0.69810000  | -1.03360000 |
| C | 2.02030000  | -3.05050000 | -0.92660000 |
| C | 3.80540000  | -0.62760000 | 2.66700000  |
| C | -0.29310000 | 1.42600000  | -0.98930000 |
| H | -0.27860000 | 2.46480000  | -1.33920000 |
| C | -2.92810000 | 3.37500000  | -0.08940000 |
| C | -5.25870000 | 1.80210000  | 0.23670000  |
| C | -2.98360000 | 1.09770000  | 1.83110000  |
| C | -2.58260000 | 0.98870000  | -2.00080000 |
| H | -2.45780000 | 1.76990000  | -2.75450000 |
| C | 1.73640000  | -2.36970000 | 1.97870000  |
| H | 2.50350000  | 1.27130000  | 1.42950000  |
| H | 3.61410000  | 0.15040000  | -0.35990000 |

### Species C

HF energy= -2515.53384353

No Imaginary frequency

Zero-point correction= 0.234449 (Hartree/Particle)

Thermal correction to Energy= 0.283259

Thermal correction to Enthalpy= 0.284203

Thermal correction to Gibbs Free Energy= 0.146092

Sum of electronic and zero-point Energies= -2515.299394

Sum of electronic and thermal Energies= -2515.250585

Sum of electronic and thermal Enthalpies= -2515.249641

Sum of electronic and thermal Free Energies= -2515.387751

### Coordinates: C

|    |             |             |             |
|----|-------------|-------------|-------------|
| Ru | 2.84170000  | 1.55320000  | -0.39190000 |
| Ru | -3.49420000 | -1.33090000 | -0.47190000 |
| Ru | 2.71800000  | -1.19730000 | -0.94160000 |
| Ru | 2.06200000  | -0.45490000 | 1.73360000  |
| Ru | -3.40430000 | 1.39850000  | 0.13600000  |
| O  | 3.17100000  | 2.07930000  | -3.38750000 |
| O  | -6.51770000 | -1.53350000 | -0.20570000 |
| O  | 2.39750000  | 4.50730000  | 0.46330000  |
| N  | 0.80790000  | 0.96760000  | -0.53310000 |
| N  | -1.46350000 | -0.64110000 | -0.61100000 |
| O  | 0.91960000  | -3.17630000 | 2.55460000  |
| O  | -2.78040000 | -2.78320000 | 2.19260000  |
| O  | 5.86180000  | 1.43960000  | 0.04450000  |

|   |             |             |             |
|---|-------------|-------------|-------------|
| O | 0.00740000  | 1.32580000  | 3.14780000  |
| O | -3.25060000 | -3.59700000 | -2.53230000 |
| O | 1.97920000  | -4.17610000 | -0.79640000 |
| O | -2.90670000 | 0.45840000  | 3.03070000  |
| O | 1.55010000  | -0.78960000 | -3.73250000 |
| O | -2.64300000 | 4.37200000  | 0.37650000  |
| O | 5.71710000  | -1.46730000 | -1.70760000 |
| O | -6.42900000 | 1.82610000  | 0.45530000  |
| O | 4.29170000  | -0.39970000 | 3.91250000  |
| C | -3.08830000 | -2.28700000 | 1.20650000  |
| C | 3.04300000  | 1.85320000  | -2.26980000 |
| C | 2.54310000  | 3.40850000  | 0.17830000  |
| C | -3.73670000 | 0.26680000  | -1.77160000 |
| H | -4.59010000 | 0.48160000  | -2.42150000 |
| C | 0.91020000  | -0.40000000 | -0.10580000 |
| C | 4.73260000  | 1.50840000  | -0.14010000 |
| C | 4.60970000  | -1.39350000 | -1.42460000 |
| C | -3.33240000 | -2.77370000 | -1.73850000 |
| C | -5.37460000 | -1.49020000 | -0.29350000 |
| C | 2.03730000  | -0.94480000 | -2.70390000 |
| C | -0.34080000 | -1.13330000 | -0.20040000 |
| H | -0.34600000 | -2.18950000 | 0.09250000  |
| C | 0.75410000  | 0.61100000  | 2.65930000  |
| C | -1.54620000 | 0.75010000  | -0.95030000 |
| C | 2.26530000  | -3.06620000 | -0.86110000 |
| C | 3.47090000  | -0.43320000 | 3.12010000  |
| C | -0.30330000 | 1.49280000  | -0.91530000 |
| H | -0.30020000 | 2.54080000  | -1.23750000 |
| C | -2.94590000 | 3.26700000  | 0.28430000  |
| C | -5.29400000 | 1.68800000  | 0.35900000  |
| C | -3.08640000 | 0.80780000  | 1.95040000  |
| C | -2.60380000 | 1.08910000  | -1.88380000 |
| H | -2.50230000 | 1.93510000  | -2.56760000 |
| C | 1.34240000  | -2.15470000 | 2.26000000  |
| H | 2.73340000  | 1.17780000  | 1.37530000  |
| H | 3.36580000  | -1.26540000 | 0.76790000  |
